# Supplementary material
Source: publisher figshare collection journal article supplement (https://frontiersin.figshare.com/ndownloader/files/17762033)
Supplement: Supplementary file [file 17762033]

**Genetic map**

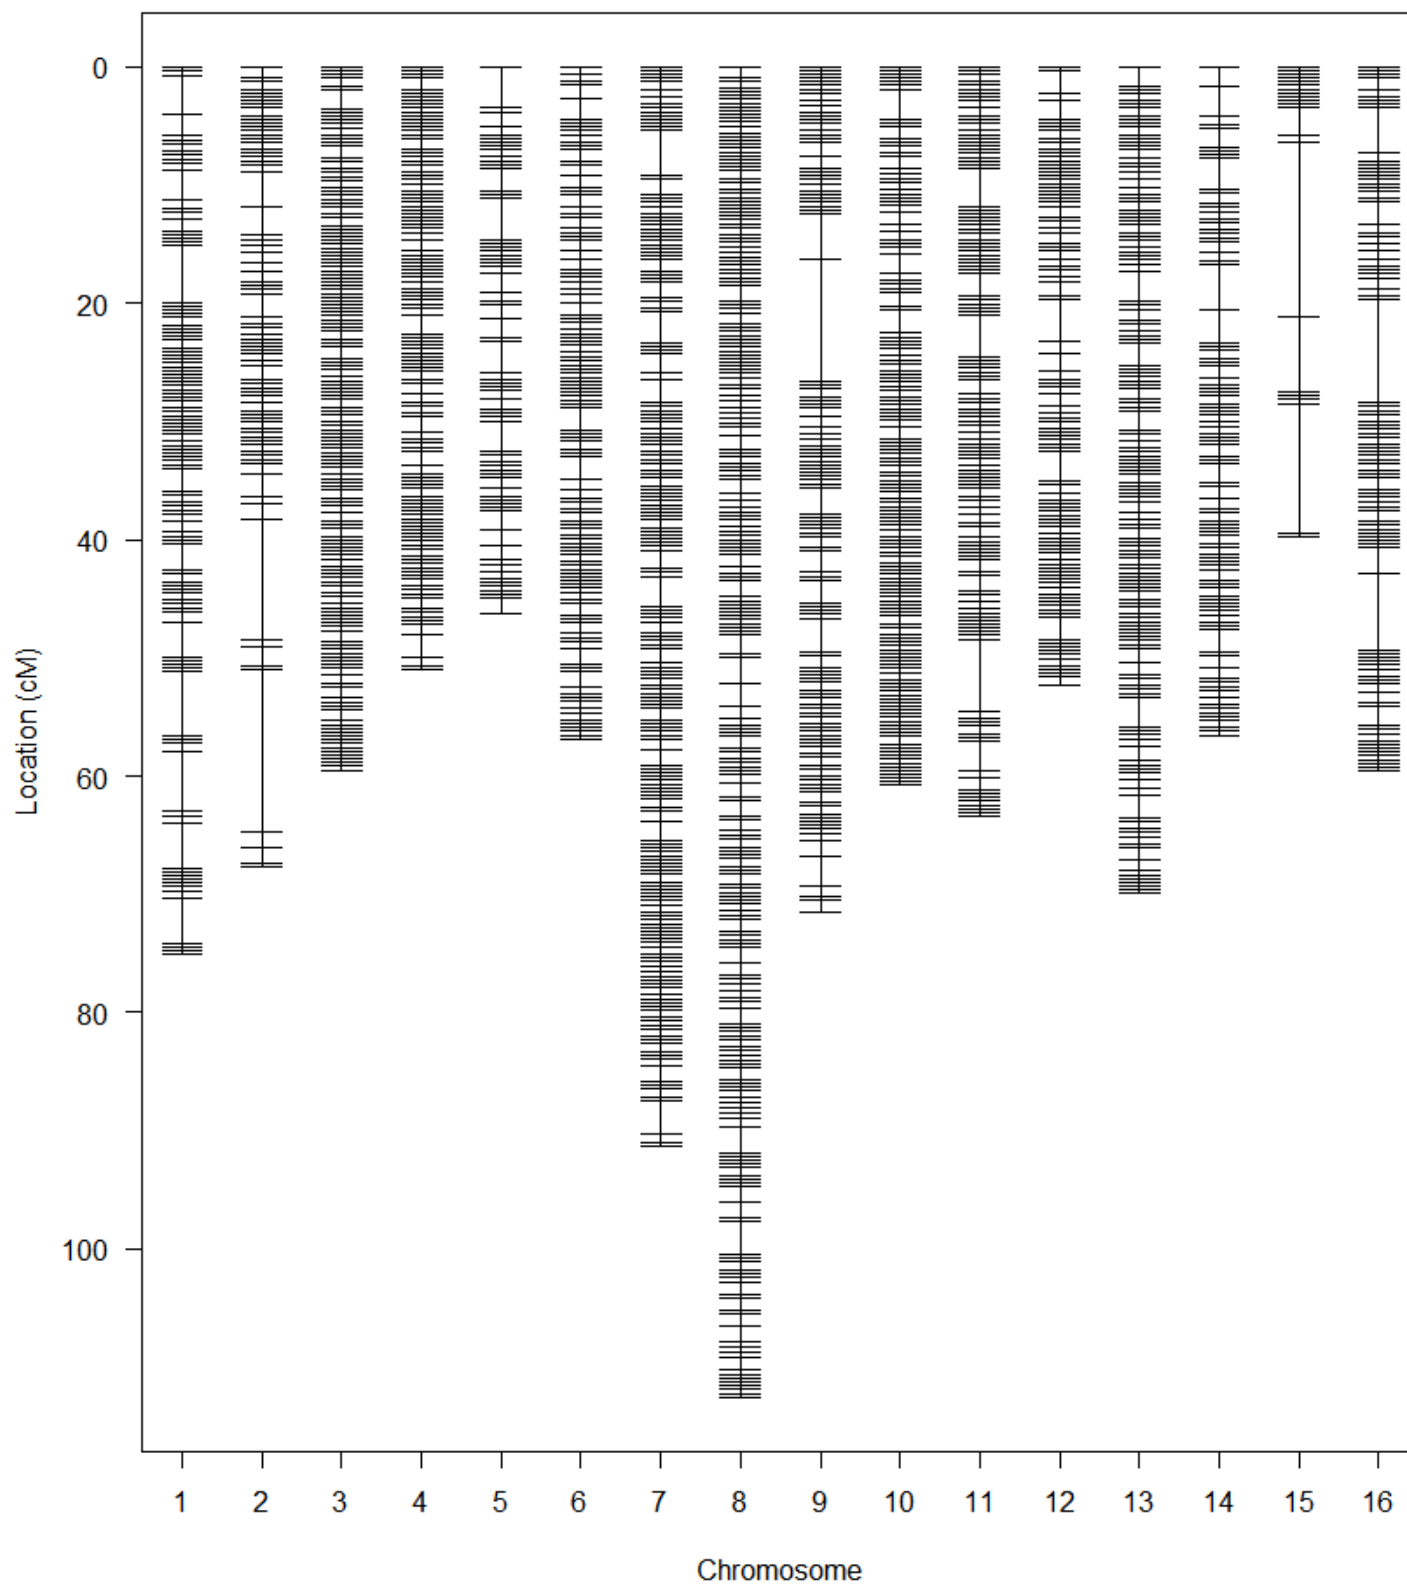

**Supplementary Figure S3.** Genetic map of Chandler.
